# Supplementary material for: Electronic, mechanical, optical and photocatalytic properties of two-dimensional Janus XGaInY (X, Y ;= S, Se and Te) monolayers
Source: Royal Society of Chemistry journal article supplement (doi:10.1039/d1ra02324a), 2021-01-01
Supplement: d1ra02324a1.pdf [file d1ra02324a1.pdf]

## **Electronic, mechanical, optical and photocatalytic properties of two dimensional Janus XGaInY (X, Y = S, Se and Te) monolayers**

Iqtidar Ahmad,<sup>a</sup> Ismail Shahid,<sup>b</sup> Anwar Ali,<sup>c</sup> Gao lei<sup>\*d</sup> and Jinming Cai<sup>\*a</sup>

<sup>a</sup> *School of Material Science and Engineering, Kunming University of Science and Technology, Kunming 650093, Yunnan, P. R. China.*

<sup>b</sup> *School of Materials Science and Engineering, Computational Centre for Molecular Science, Institute of New Energy Material Chemistry, Nankai University, Tianjin 300350, P. R. China.*

<sup>c</sup> *College of Physics and Information Technology, Shaanxi Normal University, Xian 710119, Shaanxi, P. R. China.*

<sup>d</sup> *Faculty of Science, Kunming University of Science and Technology, Kunming 650093, Yunnan, P. R. China.*

| System          | C11   | C12  | C66   | Y     | $\nu$ | Status |
|-----------------|-------|------|-------|-------|-------|--------|
| <b>GaS</b>      | 32.11 | 5.99 | 13.06 | 30.98 | 0.20  | Stable |
| <b>SGaInS</b>   | 23.86 | 5.65 | 9.10  | 22.52 | 0.23  | Stable |
| <b>SeGaInSe</b> | 20.15 | 4.73 | 7.71  | 19.04 | 0.23  | Stable |
| <b>TeGaInTe</b> | 17.02 | 3.78 | 6.62  | 16.18 | 0.22  | Stable |
| <b>SGaInSe</b>  | 21.30 | 4.72 | 8.29  | 20.25 | 0.22  | Stable |
| <b>SeGaInS</b>  | 22.88 | 5.69 | 8.59  | 21.47 | 0.25  | Stable |
| <b>SGaInTe</b>  | 15.54 | 3.55 | 5.99  | 14.73 | 0.23  | Stable |
| <b>TeGaInS</b>  | 21.70 | 5.17 | 8.26  | 20.46 | 0.23  | Stable |
| <b>SeGaInTe</b> | 17.39 | 3.89 | 6.75  | 16.51 | 0.22  | Stable |
| <b>TeGaInSe</b> | 18.94 | 4.03 | 7.45  | 18.08 | 0.21  | Stable |

Table S1 Elastic constants, Young's modulus (Y) and Poisson ratio ( $\nu$ ) of GaS and Janus XGaInY monolayers.

| Structures      | $\Delta q$      | $\Delta q$  |
|-----------------|-----------------|-----------------|-----------------|-----------------|-----------------|-----------------|-------------|
|                 | Ga→S            | In→S            | Ga→Se           | In→Se           | Ga→Te           | In→Te           | Ga→In       |
| <b>GaS</b>      | 0.85<br>(51.56) | ...             | ...             | ...             | ...             | ...             | ...         |
| <b>SGaInS</b>   | 0.78<br>(51.55) | 0.83<br>(51.03) | ...             | ...             | ...             | ...             | 0<br>(0.44) |
| <b>SeGaInSe</b> | ...             | ...             | 0.63<br>(50.32) | 0.71<br>(49.73) | ...             | ...             | 0<br>(0.50) |
| <b>TeGaInTe</b> | ...             | ...             | ...             | ...             | 0.42<br>(54.70) | 0.54<br>(54.05) | 0<br>(0.55) |
| <b>SGaInSe</b>  | 0.81<br>(51.57) | ...             | ...             | 0.66<br>(49.70) | ...             | ...             | 0<br>(0.32) |
| <b>SeGaInS</b>  | ...             | 0.87<br>(51.01) | 0.60<br>(50.27) | ...             | ...             | ...             | 0<br>(0.63) |
| <b>SGaInTe</b>  | 0.82<br>(51.59) | ...             | ...             | ...             | ...             | 0.48<br>(53.88) | 0<br>(0.05) |
| <b>TeGaInS</b>  | ...             | 0.82<br>(51.00) | ...             | ...             | 0.43<br>(54.53) | ...             | 0<br>(0.99) |
| <b>SeGaInTe</b> | ...             | ...             | 0.66<br>(50.43) | ...             | ...             | 0.48<br>(53.97) | 0<br>(0.23) |
| <b>TeGaInSe</b> | ...             | ...             | ...             | 0.73<br>(49.79) | 0.40<br>(54.59) | ...             | 0<br>(0.84) |

Table S2 Bader charges of all Janus monolayers. The FIC (%) values are enclosed in bracket.

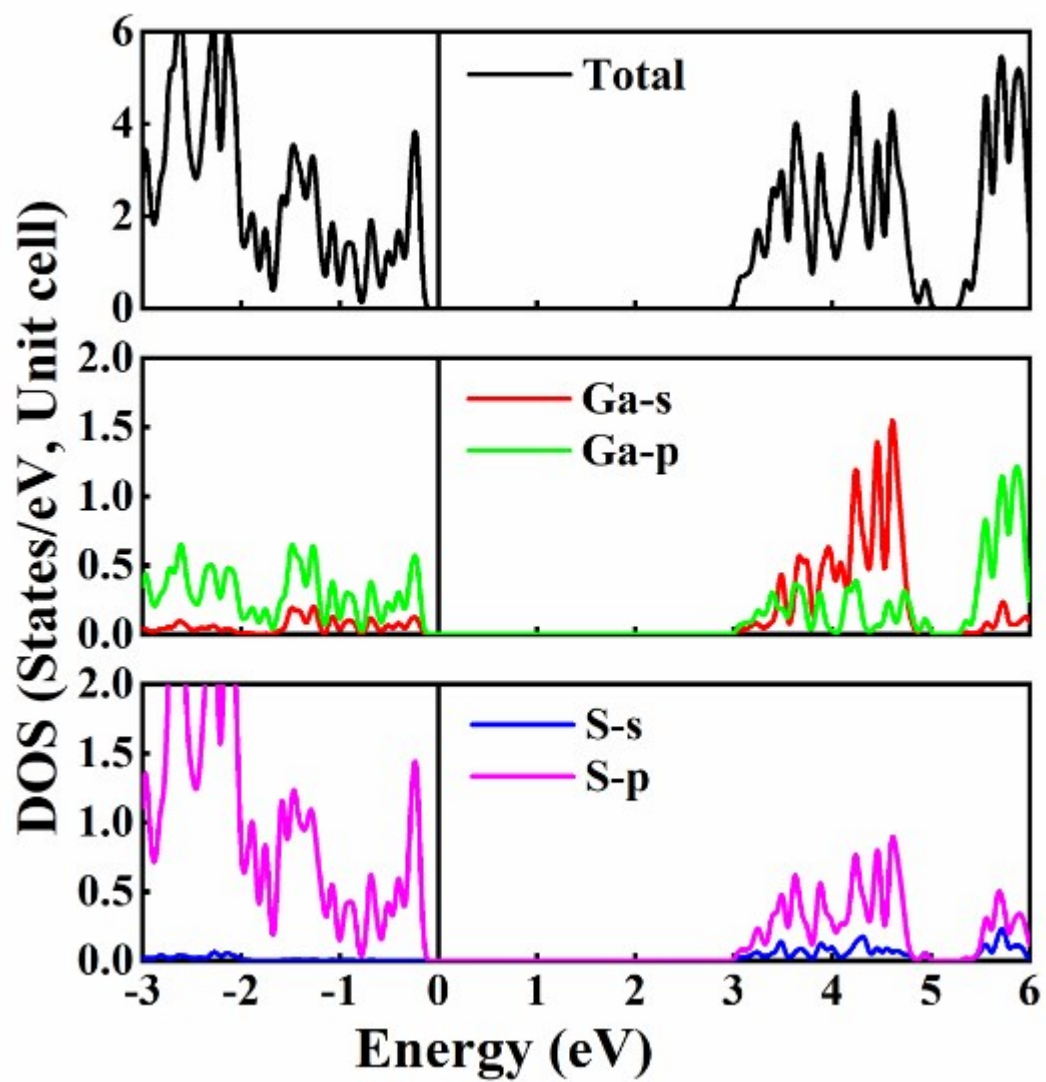

Fig. S1 PDOS of GaS

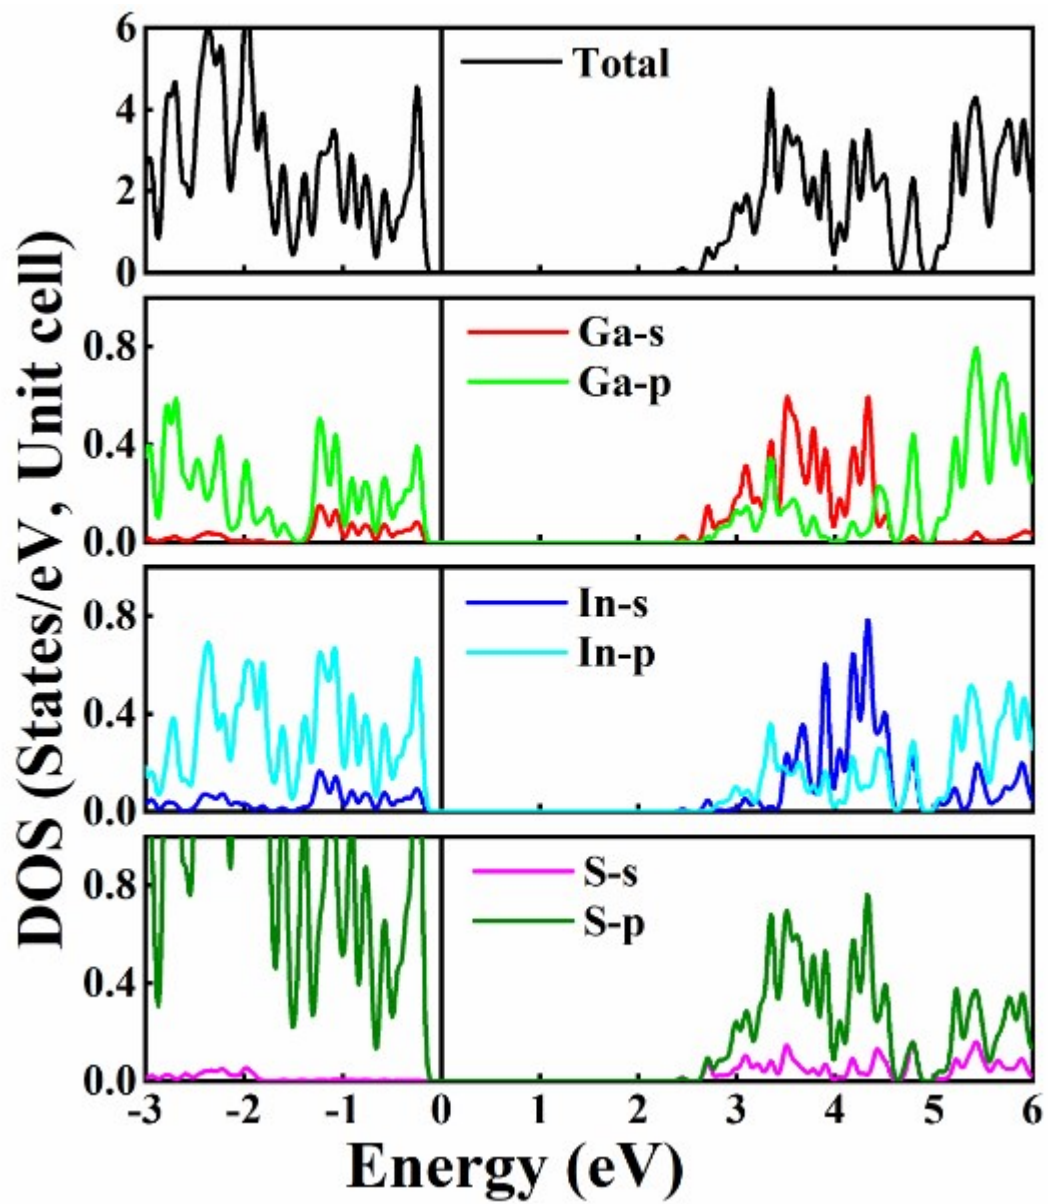

Fig. S2 PDOS of SGaInS

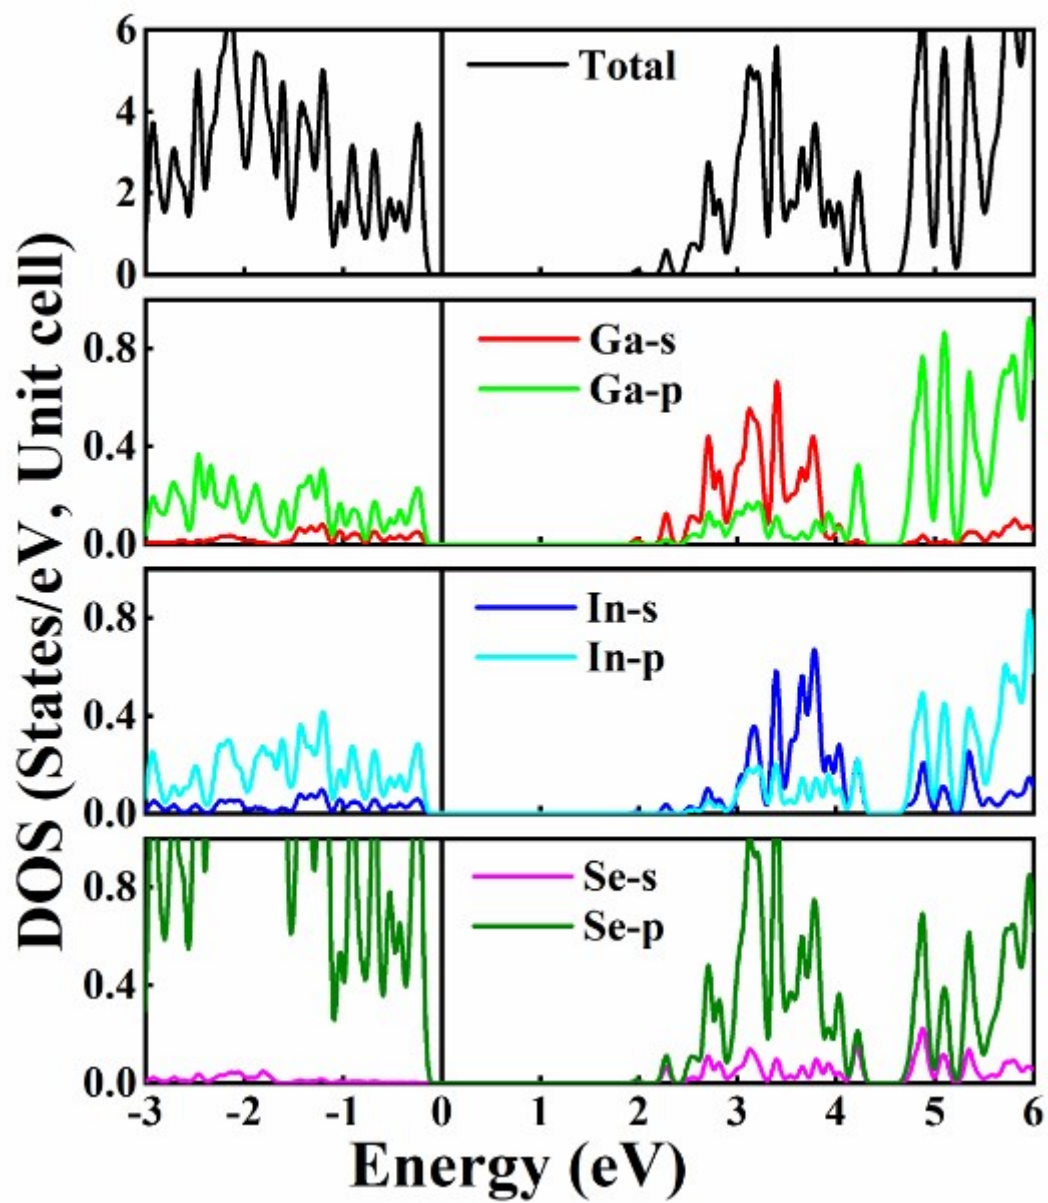

Fig. S3 PDOS of SeGaInSe

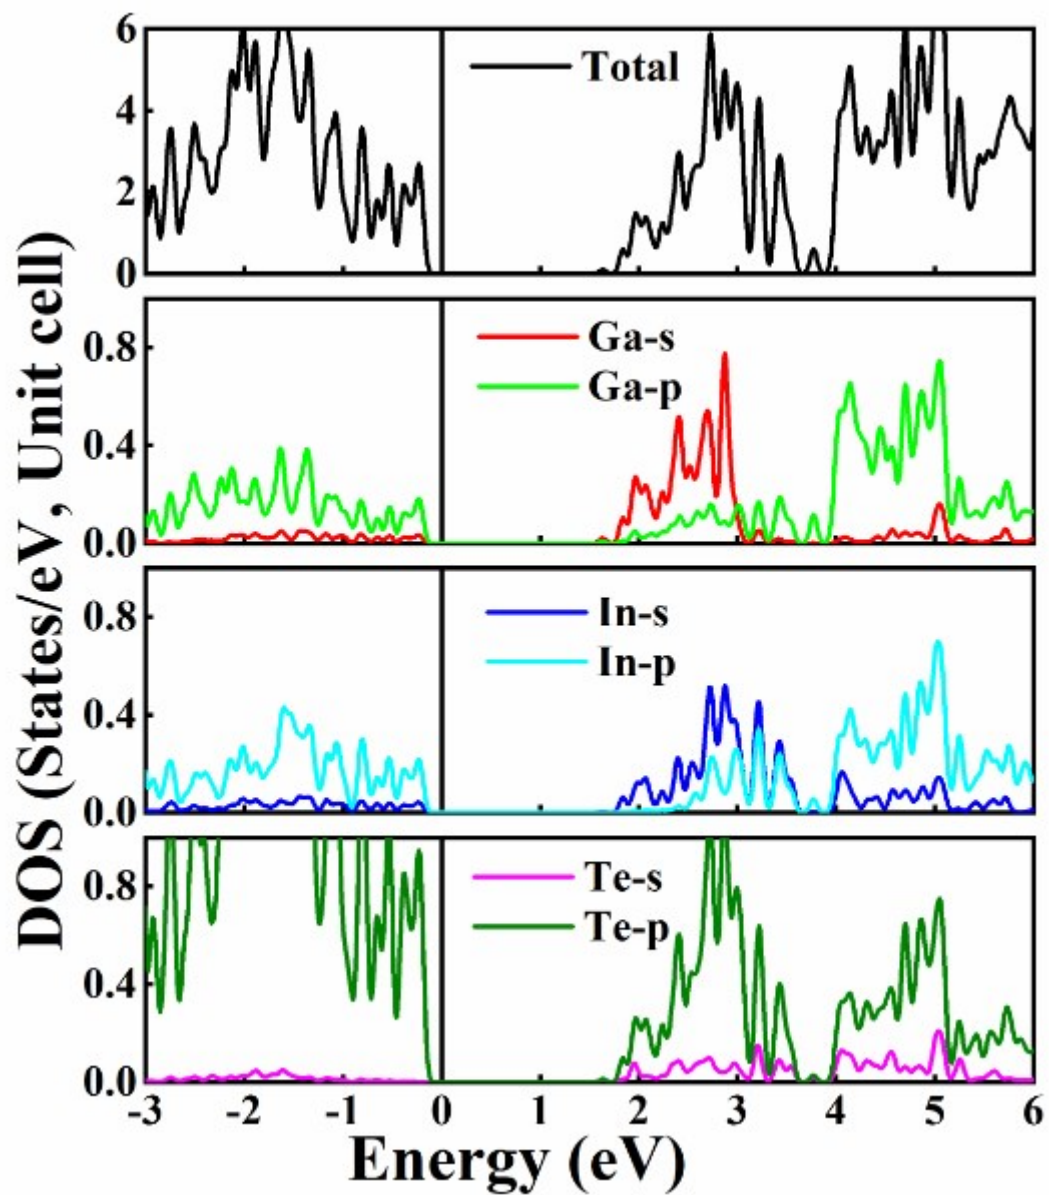

Fig. S4 PDOS of TeGaInTe

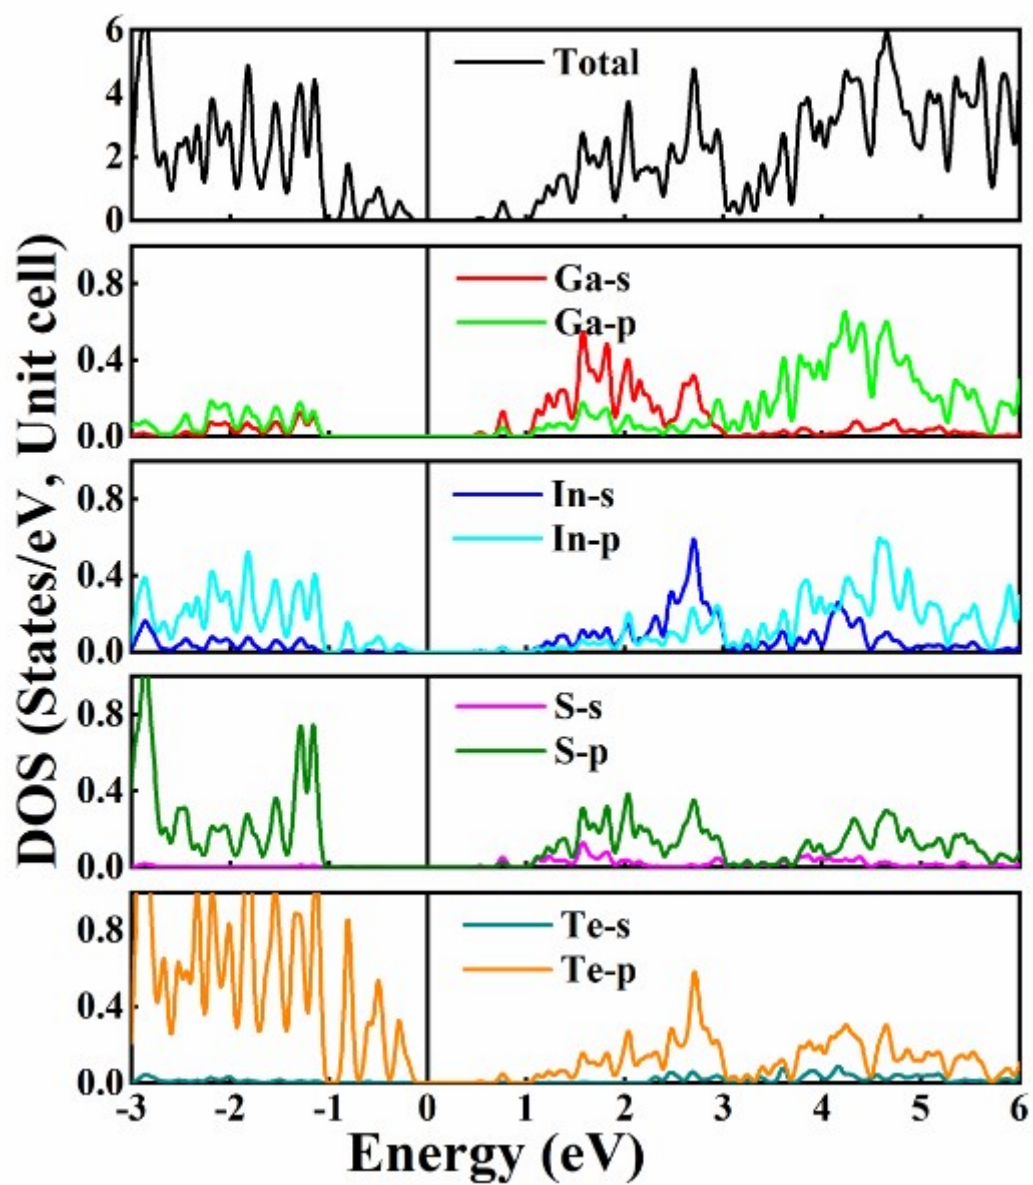

Fig. S5 PDOS of SGaInTe

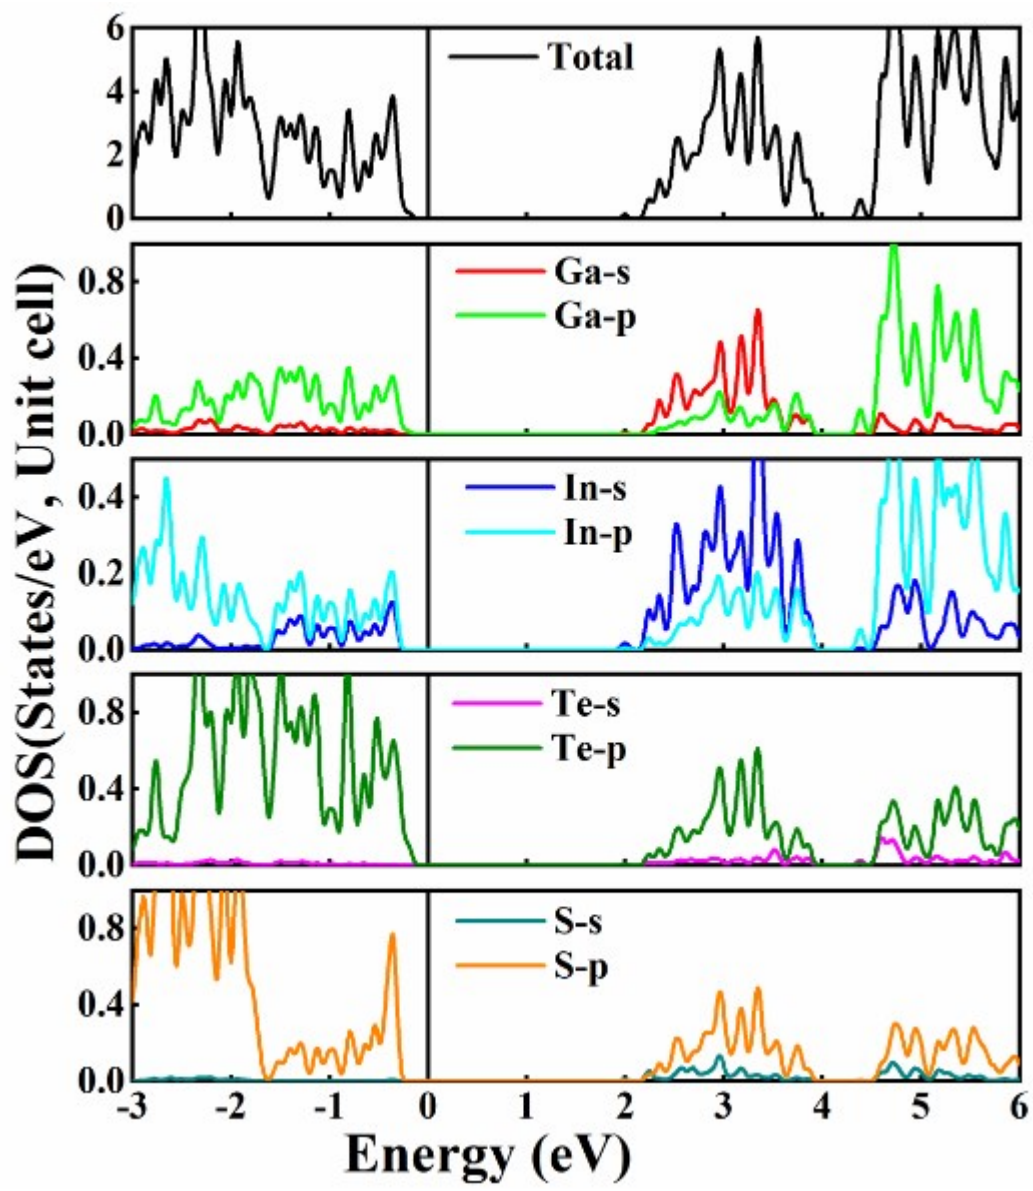

Fig. S6 PDOS of TeGaInS



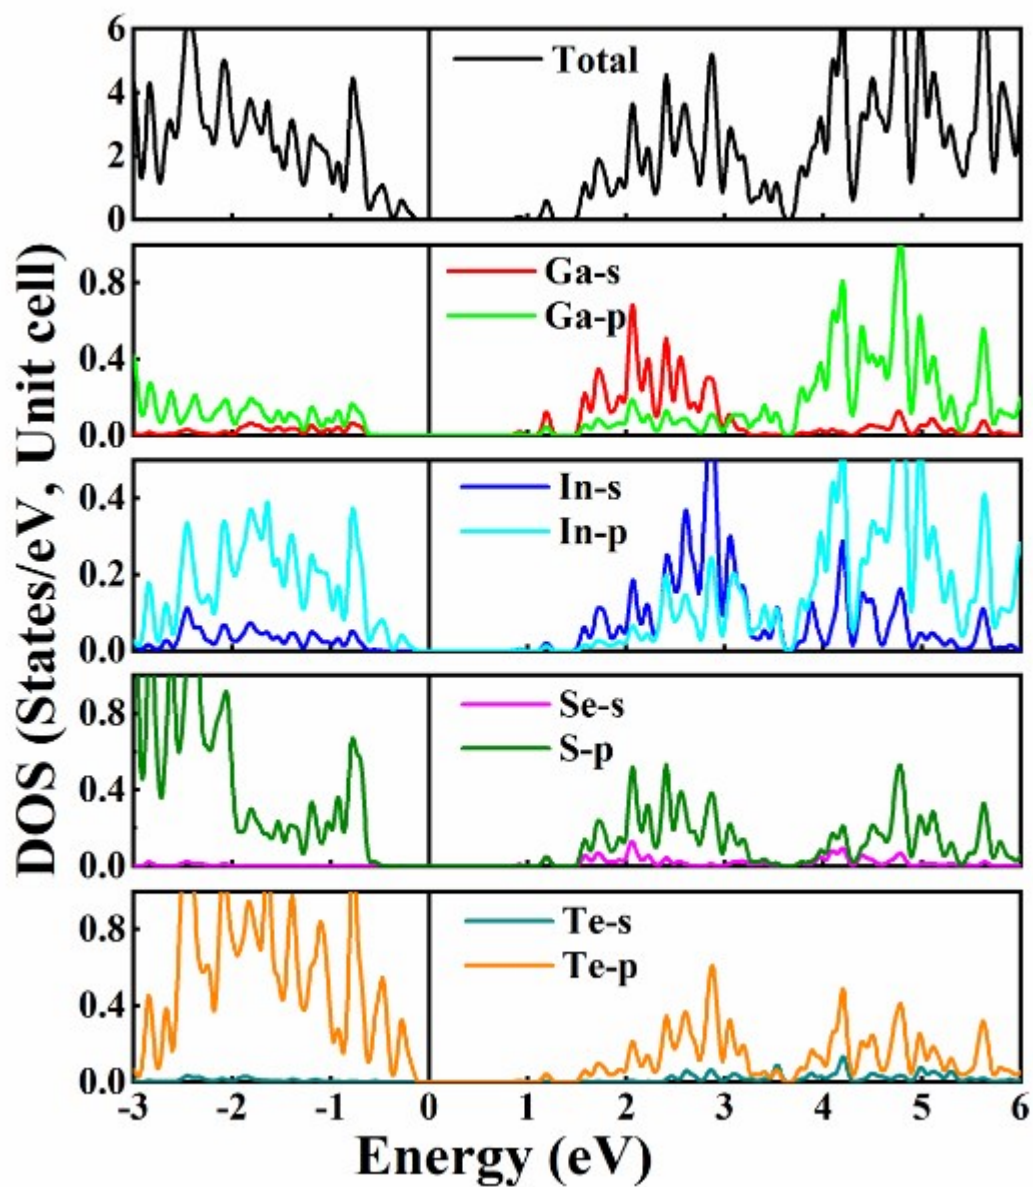

Fig. S7 PDOS of SeGaInTe

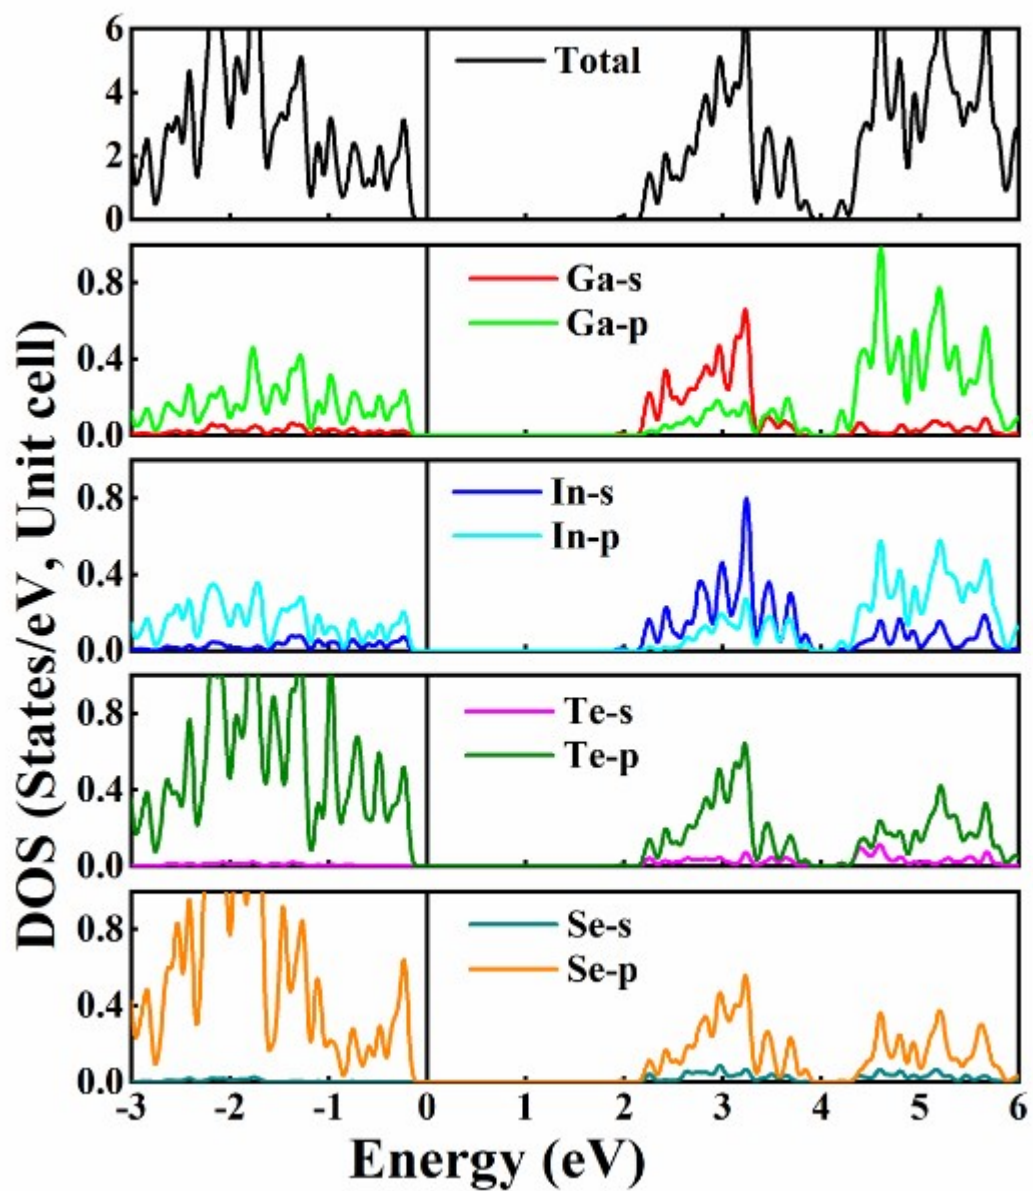

Fig. S8 PDOS of TeGaInSe

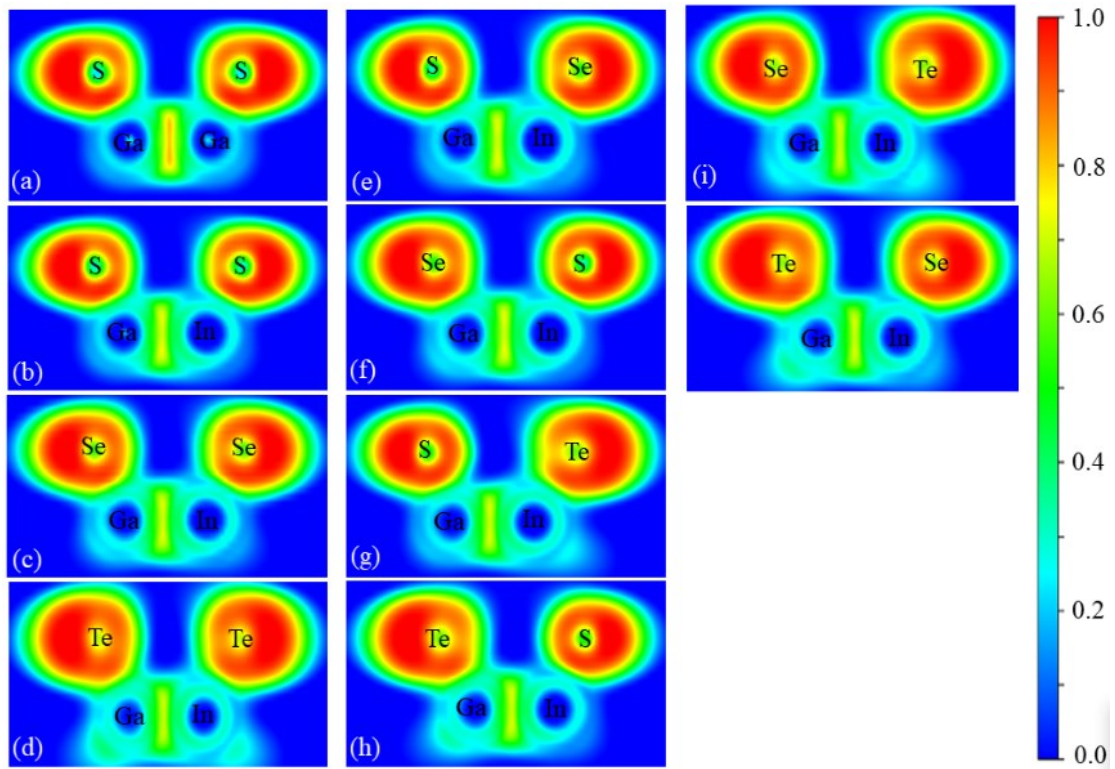

Fig. S9 ELF plot along the (110) plane of (a) single-layer GaS, and Janus (b) SGaInS, (c) SeGaInSe, (d) TeGaInTe, (e) SGaInSe, (f) SeGaInS, (g) SGaInTe, (h) TeGaInS, (i) SeGaInTe and (j) TeGaInSe monolayers.

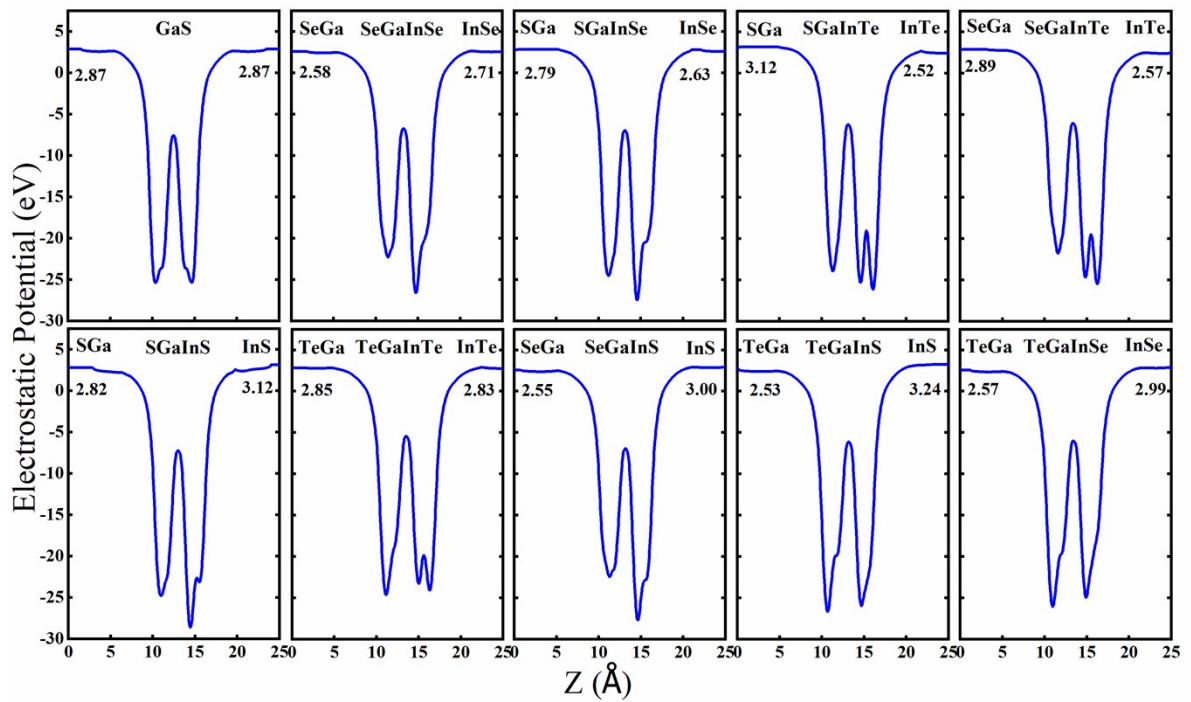

Fig. S10 The electrostatic potential of pristine and Janus XGaInY monolayers with dipole correction.
